# Supplementary material for: Effects of Ge and Sn substitution on the metal–semiconductor transition and thermoelectric properties of Cu12Sb4S13tetrahedrite
Source: Royal Society of Chemistry journal article supplement (doi:10.1039/c7cp00351j), 2017-01-01
Supplement: c7cp00351j1.pdf [file c7cp00351j1.pdf]

## Electronic Supplementary Information

### Effects of Ge and Sn substitution on the metal-semiconductor transition and thermoelectric properties of $\text{Cu}_{12}\text{Sb}_4\text{S}_{13}$ tetrahedrite

Yasufumi Kosaka,<sup>a</sup> Koichiro Suekuni,<sup>\*b</sup> Katsuaki Hashikuni,<sup>a</sup> Yohan Bouyrie,<sup>c</sup>  
Michihiro Ohta,<sup>c</sup> and Toshiro Takabatake<sup>a,d</sup>

<sup>a</sup> *Department of Quantum Matter, Graduate School of Advanced Sciences of Matter,  
Hiroshima University, Higashi-Hiroshima, 739-8530, Japan*

<sup>b</sup> *Department of Applied Science for Electronics and Materials, Interdisciplinary Graduate  
School of Engineering Sciences, Kyushu University, Kasuga, Fukuoka 816-8580, Japan*  
*\* suekuni.koichiro.063@m.kyushu-u.ac.jp*

<sup>c</sup> *Research Institute for Energy Conservation, National Institute of Advanced Industrial  
Science and Technology (AIST), Tsukuba, Ibaraki 305-8568, Japan*

<sup>d</sup> *Institute for Advanced Materials Research, Hiroshima University, Higashi-Hiroshima,  
739-8530, Japan*

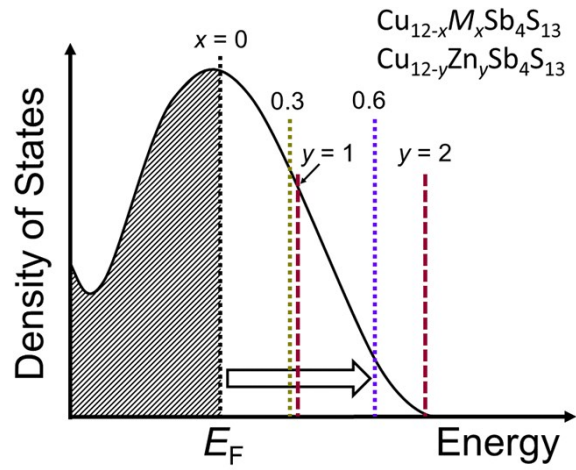

Fig. S1 Schematic picture of the density of states near the valence band top for  $\text{Cu}_{12-x}\text{M}_x\text{Sb}_4\text{S}_{13}$  ( $M = \text{Ge}, \text{Sn}$ ) and  $\text{Cu}_{12-y}\text{Zn}_y\text{Sb}_4\text{S}_{13}$ .

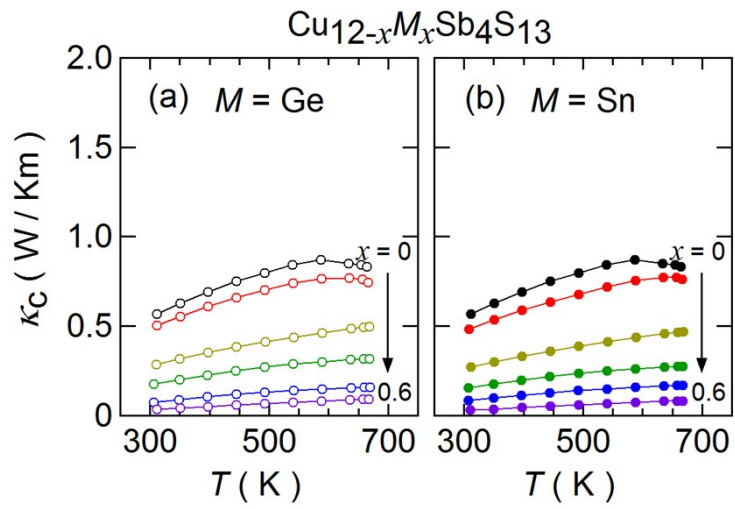

Fig. S2 Temperature dependence of charge carrier part of thermal conductivity  $\kappa_c$  for (a)  $M = \text{Ge}$  and (b)  $M = \text{Sn}$  of  $\text{Cu}_{12-x}\text{M}_x\text{Sb}_4\text{S}_{13}$  ( $x \leq 0.6$ ).
